# Supplementary material for: Simultaneous Quantification of Vibrio metoecus and Vibrio cholerae with Its O1 Serogroup and Toxigenic Subpopulations in Environmental Reservoirs
Source: MDPI journal article supplement (doi:10.3390/pathogens9121053), 2020-12-16
Supplement: s1 [file s1]

## Supplementary data

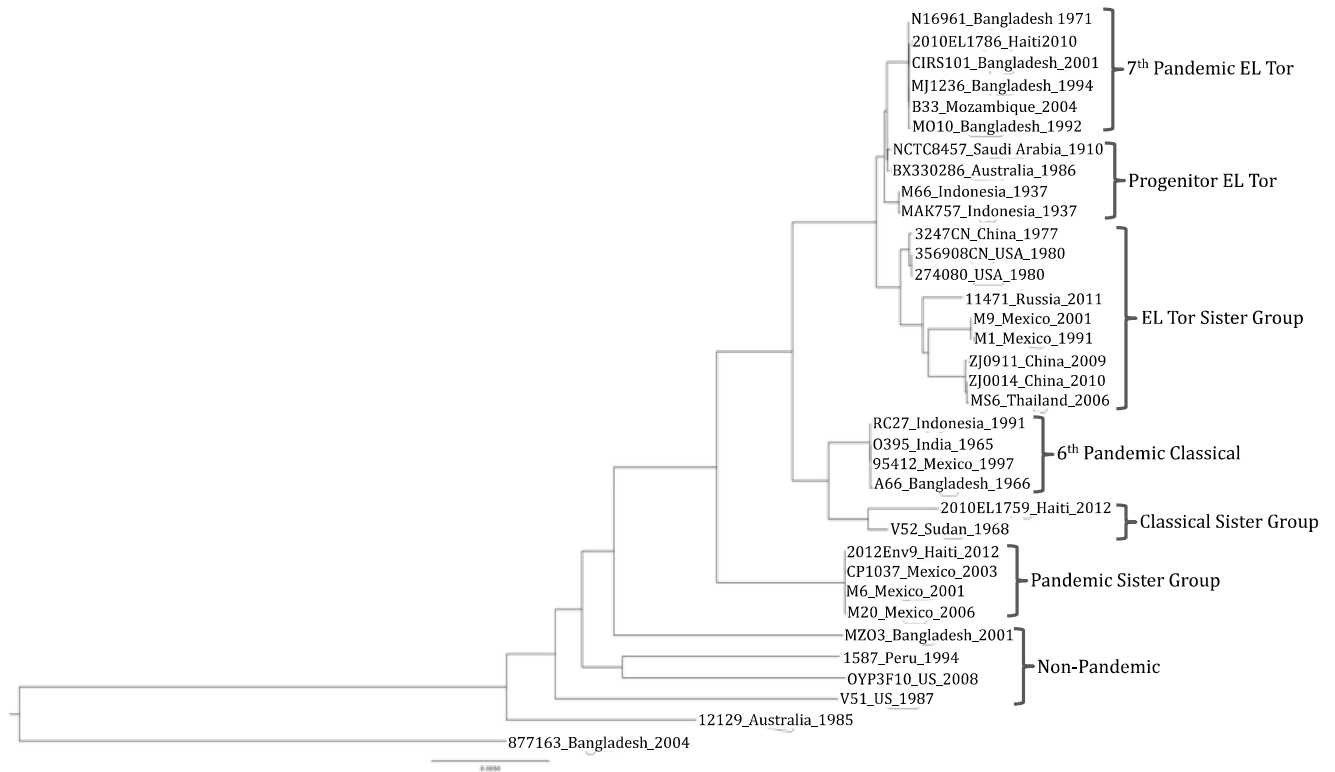

**FIG S1. Phylogeny of the pandemic generating lineage of *V. cholerae*.** The maximum likelihood phylogenomic tree was constructed from the alignment of locally collinear blocks (2,367,372 bp) using GTR gamma substitution model with 100 bootstrap replicates (all nodes had >98% bootstrap support). Environmental strain *Vibrio sp.* strain 877-163 was used to root the tree. The source and isolation year of the strains used are indicated next to the strain names.

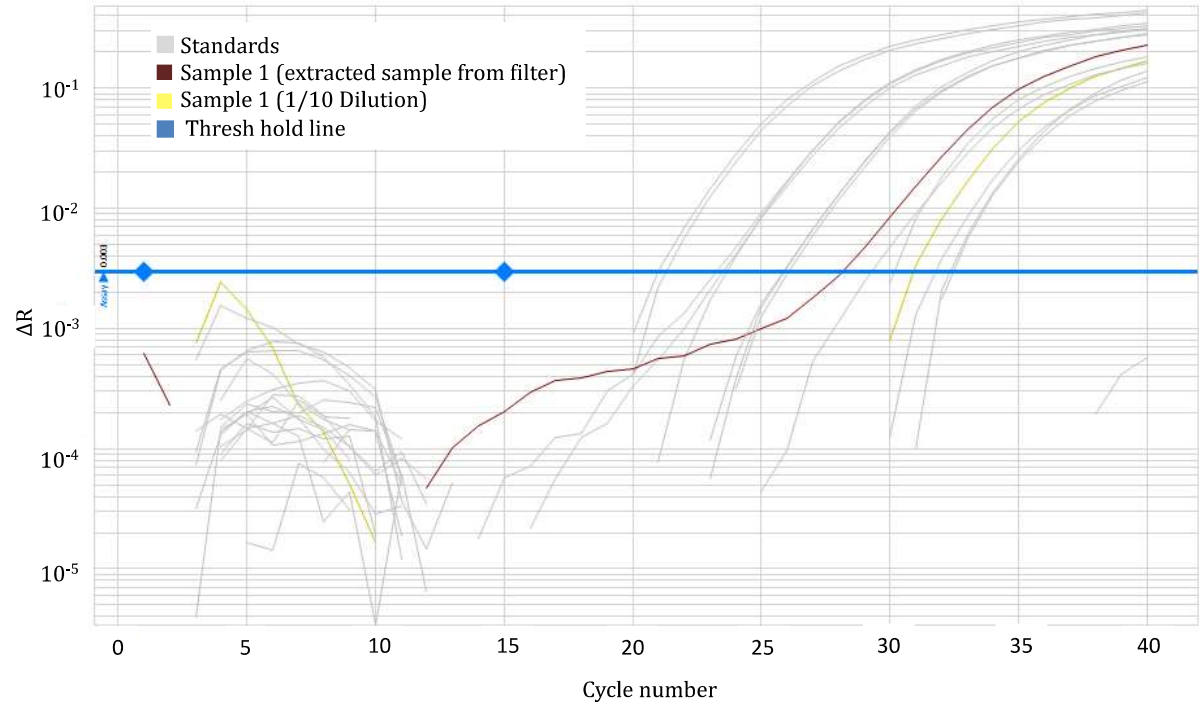

**FIG S2. Testing of inhibition in qPCR amplification.** The qPCR assay was performed on an extracted DNA sample treated with One step PCR inhibitory removal kit (sample1) from Oyster Pond large fraction size ( $> 63 \mu\text{m}$ ) and a  $10\times$  dilution. Standards ( $3\times 10^4$  copies to 3 copies per reaction indicated with grey colored lines) were run in the same experiment.  $\Delta R$ , normalized reporter value. The  $10\times$  dilution of samples shifted the  $C_q$  values by  $3.3 \text{ cycles} \pm 0.05$ , indicating no inhibition.

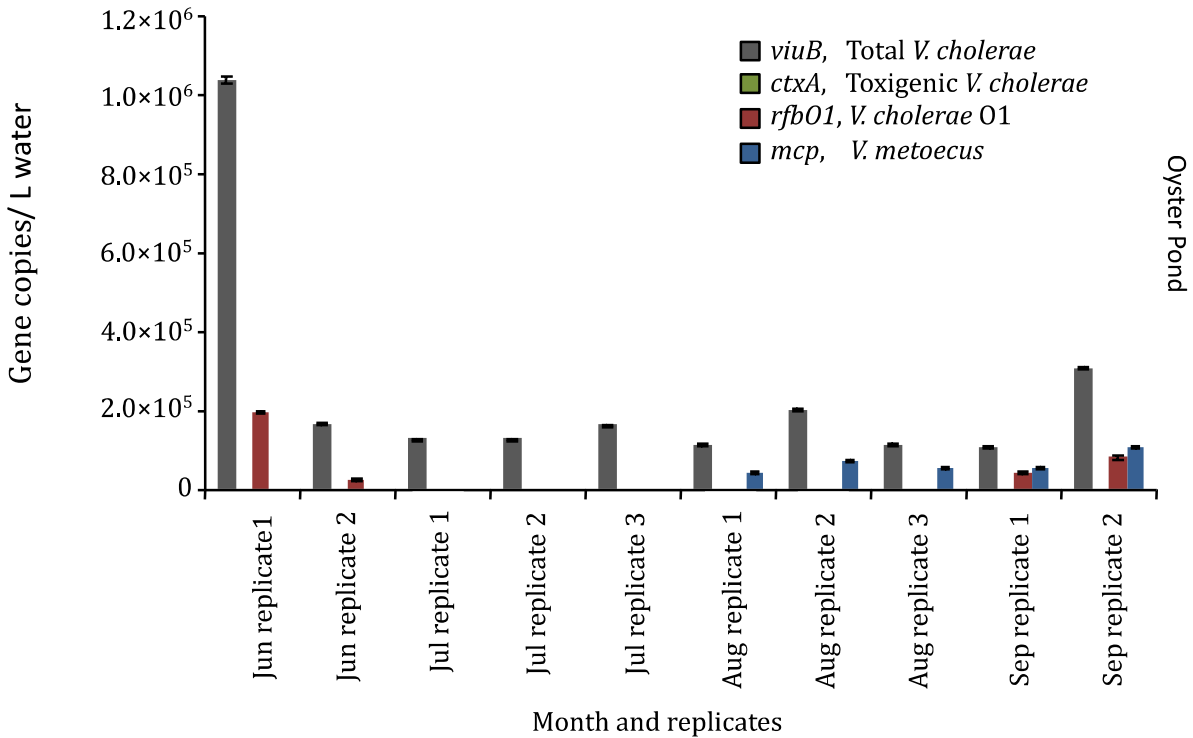

**FIG S3. Biological replicates of the quantification of *V. cholerae* along with its toxigenic and serogroup O1 subpopulations and its close relative *V. metoecus* in Oyster Pond, MA, USA.** Environmental water samples were collected in two or three replicates during the months of June to September in 2008. Each replicate represents 50 ml filtered independently from the same 10 L sample as its matching replicate. Bacteria were quantified by qPCR of marker genes. The *viuC* gene was used to quantify total *V. cholerae*; *ctxA* and *rfbO1* were used to measure toxigenic *V. cholerae* and *V. cholerae* O1, respectively; the abundance of *V. metoecus* was quantified using the *mcp* gene. Each qPCR reaction was run in triplicate. Mean values are shown with error bars indicating the standard deviation between technical replicates.

**TABLE S1. Bacterial strains used for validating primers and probes in this study**

| <b>Species</b>             | <b>No. of strains</b> | <b>Strain</b> | <b>Classification</b> | <b>Accession number*</b> |
|----------------------------|-----------------------|---------------|-----------------------|--------------------------|
| <i>V. cholerae</i>         |                       |               |                       |                          |
| <i>V. cholerae</i> non O1  | 17                    | OYP1G01       | Environmental         | NMT000000000             |
|                            |                       | OYP2A12       | Environmental         | NMTN000000000            |
|                            |                       | OYP2E01       | Environmental         | NMTK000000000            |
|                            |                       | OYP3B05       | Environmental         | LBGB000000000            |
|                            |                       | OYP3F10       | Environmental         | NMTJ000000000            |
|                            |                       | OYP4B01       | Environmental         | NMTI000000000            |
|                            |                       | OYP4C07       | Environmental         | LBGE000000000            |
|                            |                       | OYP4G08       | Environmental         | NMTH000000000            |
|                            |                       | OYP4H06       | Environmental         | NMTG000000000            |
|                            |                       | OYP4H11       | Environmental         | NMTE000000000            |
|                            |                       | OYP6D06       | Environmental         | NMTC000000000            |
|                            |                       | OYP6E07       | Environmental         | NMTB000000000            |
|                            |                       | OYP6F08       | Environmental         | NMTA000000000            |
|                            |                       | OYP6F10       | Environmental         | NMSZ000000000            |
|                            |                       | OYP7C09       | Environmental         | NMSX000000000            |
|                            |                       | OYP8C06       | Environmental         | NMSV000000000            |
|                            |                       | OYP8F12       | Environmental         | NMSU000000000            |
| <i>V. cholerae</i> 01 CTX+ | 8                     | N16961        | Clinical              | AEO03852                 |
|                            |                       | V52           | Clinical              | AEO03853                 |
|                            |                       | EDC-728       | Environmental         | MIPN000000000            |
|                            |                       | EDC-753       | Environmental         |                          |
|                            |                       | EDC-754       | Environmental         |                          |
|                            |                       | EDC-755       | Environmental         |                          |
|                            |                       | EDC-772       | Environmental         |                          |
|                            |                       | EDC-805       | Environmental         |                          |
| <i>V. cholerae</i> 01 CTX- | 2                     | M6            | Clinical              | NZ_JAACMF000000000       |
|                            |                       | M20           | Clinical              | NZ_JAACMB000000000       |

| Species                       | No. of strains | Strain     | Classification             | Accession number*  |
|-------------------------------|----------------|------------|----------------------------|--------------------|
| Other <i>Vibrio</i> species   |                |            |                            |                    |
| <i>V. parahaemolyticus</i>    | 1              | ATCC 17802 | Type strain, Clinical      | CP014046: CP014047 |
| <i>V. vulnificus</i>          | 3              | ATCC 27562 | Type strain, Clinical      | CP012882: CP012881 |
|                               |                | CVD7       | Environmental              | NA                 |
|                               |                | A9         | Environmental              | NA                 |
| <i>V. metoecus</i>            | 18             | RC341      | Environmental              | ACZT00000000       |
|                               |                | OP3H       | Environmental              | JJMN00000000       |
|                               |                | OYP4D01    | Environmental              | LBGO00000000       |
|                               |                | OYP4E03    | Environmental              | NMST00000000       |
|                               |                | OYP5B04    | Environmental              | LBGP00000000       |
|                               |                | OYP5B06    | Environmental              | LBGQ00000000       |
|                               |                | OYP5H08    | Environmental              | NMSR00000000       |
|                               |                | OYP8G05    | Environmental              | NMSQ00000000       |
|                               |                | OYP8G09    | Environmental              | NMSP00000000       |
|                               |                | OYP8G12    | Environmental              | NMSO00000000       |
|                               |                | OYP8H05    | Environmental              | NMSN00000000       |
|                               |                | OYP9B03    | Environmental              | NMSM00000000       |
|                               |                | OYP9B09    | Environmental              | NMSL00000000       |
|                               |                | OYP9C12    | Environmental              | NMSK00000000       |
|                               |                | OYP9D03    | Environmental              | LBGR00000000       |
|                               |                | OYP9D09    | Environmental              | NMSJ00000000       |
|                               |                | OYP9E03    | Environmental              | NMSI00000000       |
|                               |                | OYP9E10    | Environmental              | NMSH00000000       |
| <i>V. mimicus</i>             | 3              | ATCC 33653 | Type strain, Clinical      | NA                 |
|                               |                | ATCC 33654 | Type strain, Environmental | CP014042: CP014043 |
|                               |                | ATCC 33655 | Type strain, Clinical      | AOMO00000000       |
| Other bacterial species       |                |            |                            |                    |
| <i>Escherichia coli</i>       | 3              | CU1        | Clinical                   | NA                 |
|                               |                | CU2        | Type strain                | NA                 |
|                               |                | MSU1       | Clinical                   | NA                 |
| <i>Pseudomonas aeruginosa</i> | 3              | 12A1       | Clinical                   | NA                 |
|                               |                | PA103      | Type strain, Clinical      | JARI00000000       |
|                               |                | PA14       | Clinical                   | CP000438           |

\* Accession number obtained from Genebank
